# Supplementary material for: Polydopamine enhances the photocatalytic performance of a BiOBr-loaded 3D-printed monolithic photoreactor by fused deposition modeling
Source: Royal Society of Chemistry journal article supplement (doi:10.1039/d6ra01291d), 2026-03-31
Supplement: d6ra01291d1.pdf [file d6ra01291d1.pdf]

## **Polydopamine enhances the photocatalytic performance of BiOBr-loaded 3D-printed monolithic photoreactor by fused deposition modeling**

Fengrui Wu<sup>a, d, 1</sup>, Yan Li<sup>a, d, 1</sup>, Wenxiu Wu<sup>b, d</sup>, Zhipeng Zhang<sup>b, d</sup>, Liangbin Lin<sup>b, d</sup>, Songwei Yang<sup>b, d</sup>, Lihong Xu<sup>c</sup>, Xinshu Xia<sup>b, d</sup>, Weiming Zhou<sup>b, d\*</sup>, Changlin Cao<sup>b, d\*</sup>, Liren Xiao<sup>a, d\*</sup>

<sup>a</sup> College of Chemistry and Materials Science, Fujian Normal University, Fuzhou 350117, China.

<sup>b</sup> College of Environmental and Resource Sciences, Fujian Normal University, Fuzhou 350117, China.

<sup>c</sup> College of Materials Science and Engineering, Fujian University of Technology, Fuzhou 350117, China.

<sup>d</sup> Engineering Research Center of Polymer Green Recycling of Ministry of Education, Fuzhou 350117, China.

\* Corresponding authors: [wmzhou@fjnu.edu.cn](mailto:wmzhou@fjnu.edu.cn) (W.M. Zhou), [caochlin3@fjnu.edu.cn](mailto:caochlin3@fjnu.edu.cn) (C.L. Cao), [xlr1966@fjnu.edu.cn](mailto:xlr1966@fjnu.edu.cn) (L.R. Xiao).

<sup>1</sup> These authors contributed equally to this work.

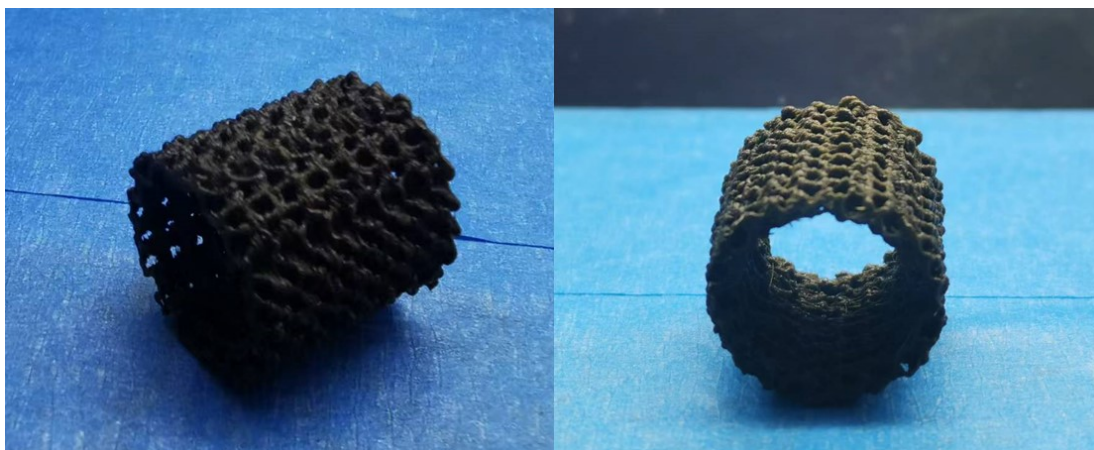

**Fig. S1** Digital photos of the 3D-printed monolithic photoreactor, D-type models containing 20 phr of *Chlorella*.

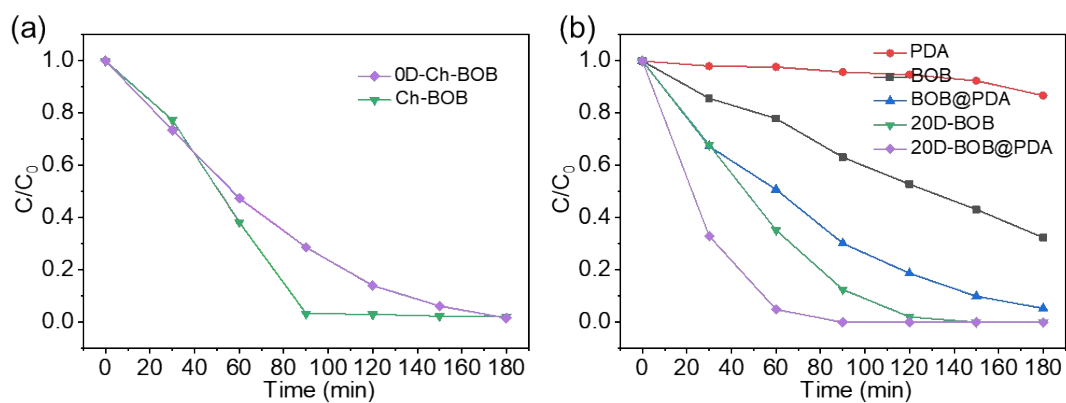

**Fig. S2** Photocatalytic degradation curves of as-prepared samples

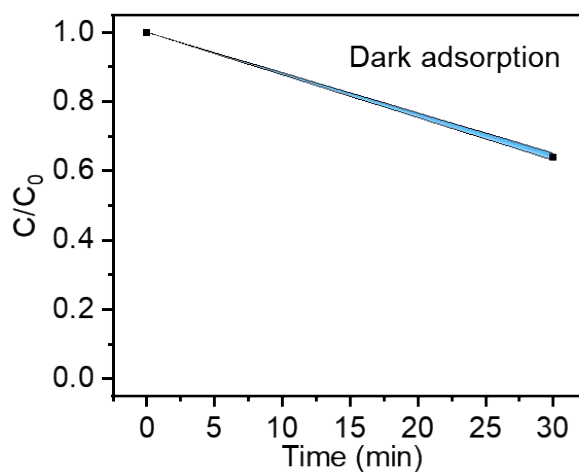

**Fig. S3** Dark adsorption curves of 20D-BOB@PDA.

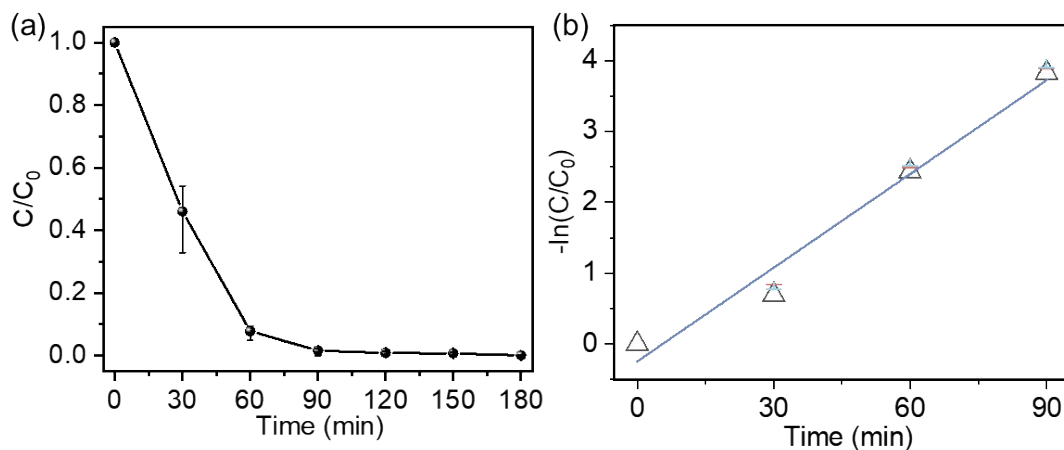

**Fig. S4** (a) Photocatalytic degradation curves and (b) equivalent pseudo-first-order kinetic curves of 20D-BOB@PDA for RhB. For all reactions, the error bars represent the standard deviation values obtained from three repeated experiments.

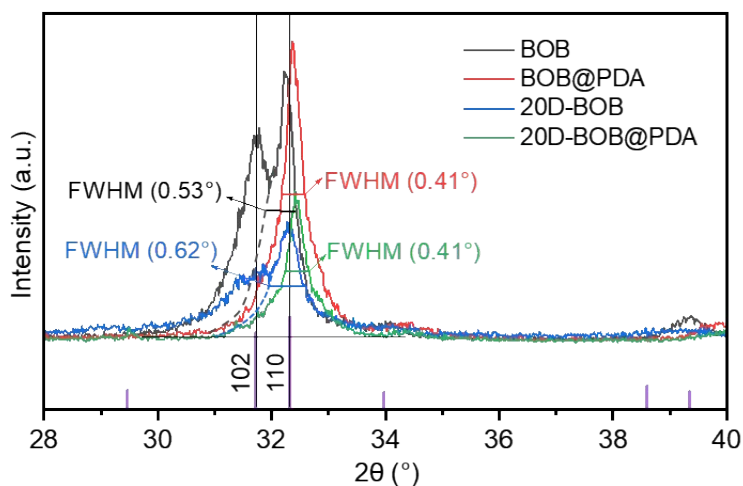

**Fig. S5** XRD patterns of BOB, BOB@PDA, 20D-BOB, and 20D-BOB@PDA.

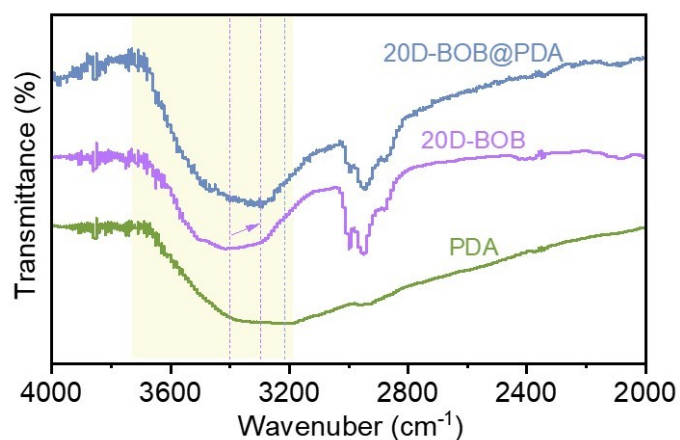

**Fig. S6** FT-IR spectra of PDA, 20D-BOB, and 20D-BOB@PDA.

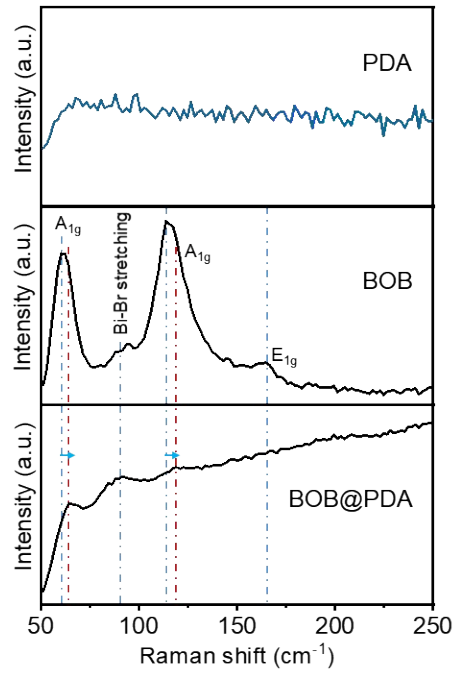

**Fig. S7** Raman spectra of BOB, PDA, and BOB@PDA.

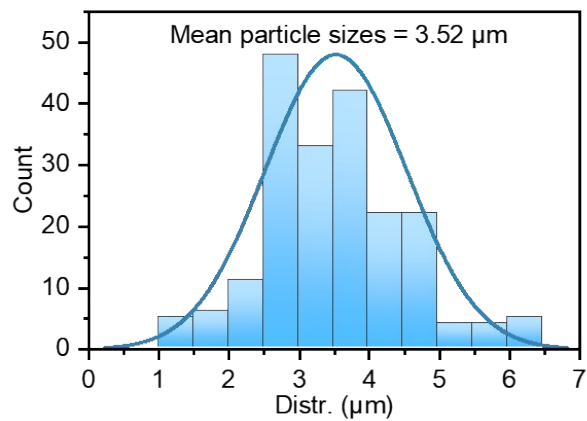

**Fig. S8** Particle size distribution of 20D-BOB@PDA.

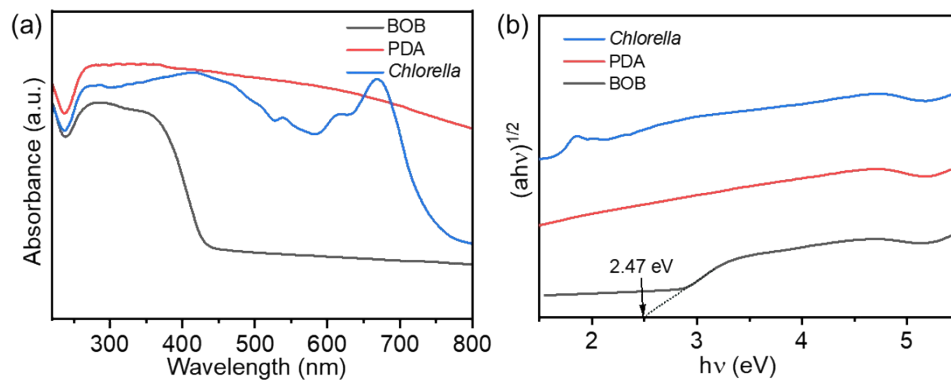

**Fig. S9** (a) UV-vis DRS and (b)  $(ah\nu)^{1/2}$  versus  $h\nu$  curves of BOB, PDA, and *Chlorella*.

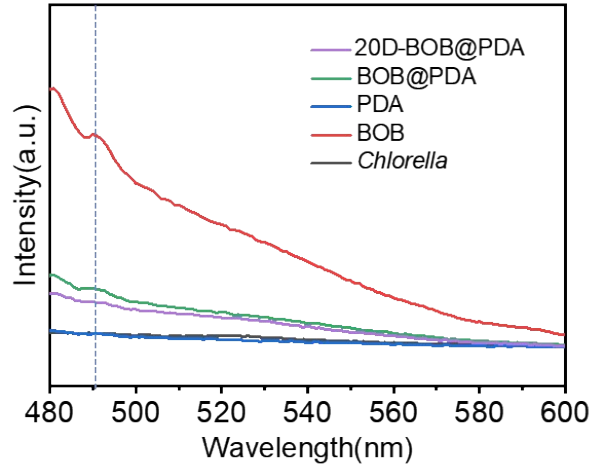

**Fig. S10** Photoluminescence spectra of 20D-BOB@PDA, BOB@PDA, PDA, BOB and *Chlorella*.

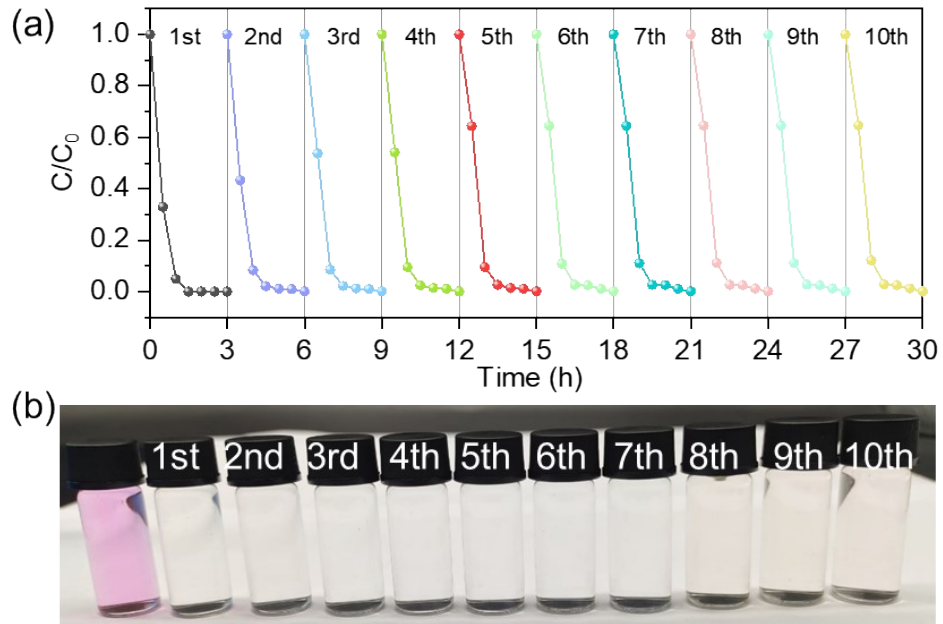

**Fig. S11** (a) Photocatalytic degradation curves and (b) digital photo of 20D-BOB@PDA with 10 discontinuous cycles.

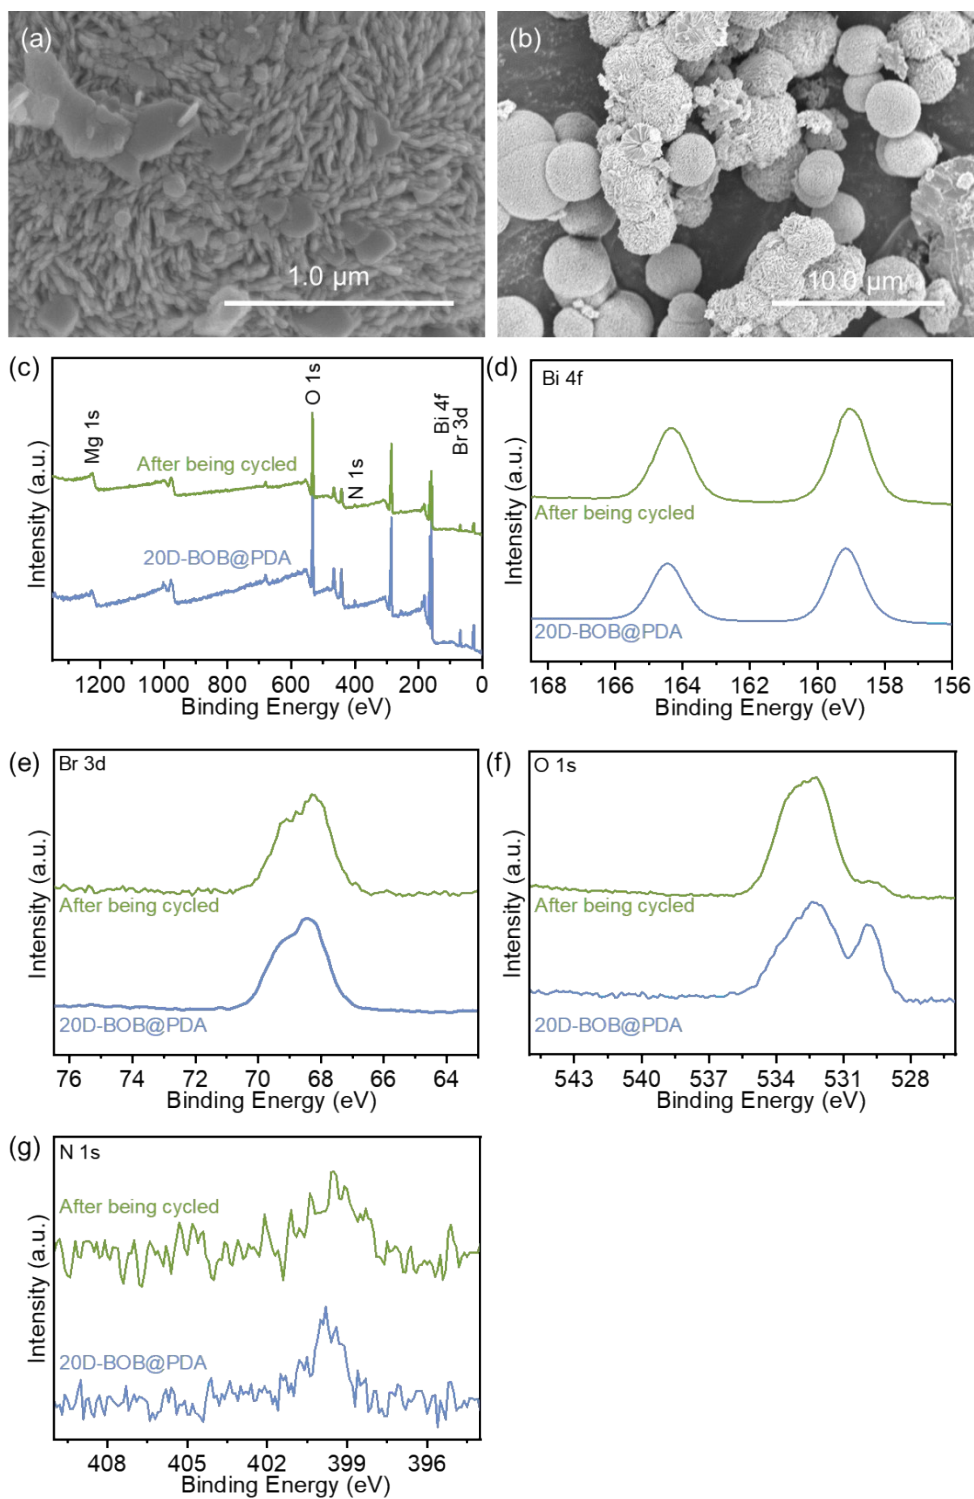

**Fig. S12** (a, b) SEM image, (c) XPS survey spectra, and high-resolution XPS spectra for (d) Bi 4f, (e) Br 3d, (f) O 1s, and (g) N 1s of 20D-BOB@PDA and its cycled samples.

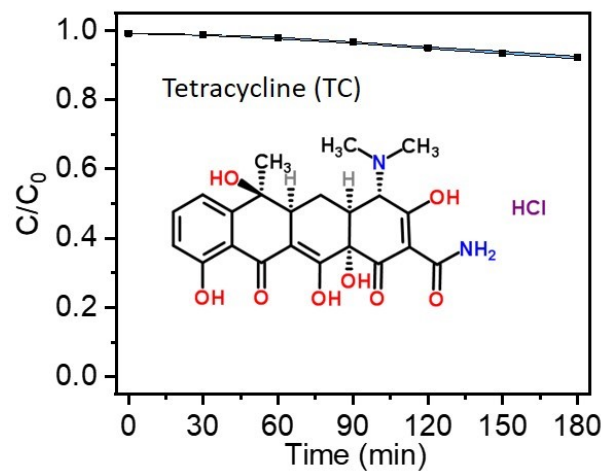

**Fig. S13** Photocatalytic degradation curves of TC without catalyst under the same conditions, inset: the molecular structure of TC.

**Table S1** The measured loading values of 20D-BOB@PDA

| No. | Initial weight (20D, g) | Final weight (20D-BOB@PDA, g) | Weight difference (g) | Load capacity (%) |
|-----|-------------------------|-------------------------------|-----------------------|-------------------|
| 1   | 1.2813                  | 1.3037                        | 0.0224                | 1.75              |
| 2   | 1.2542                  | 1.2777                        | 0.0235                | 1.87              |
| 3   | 1.2034                  | 1.2246                        | 0.0212                | 1.76              |
| 4   | 1.2131                  | 1.2353                        | 0.0222                | 1.83              |

**Table S2** Summaries of crystal information for (110) crystal planes

| Samples     | FWHM (°) | Bragg's angle (2θ, °) | Crystal size (D, nm) |
|-------------|----------|-----------------------|----------------------|
| BOB         | 0.53     | 32.22                 | 15.60                |
| BOB@PDA     | 0.41     | 32.41                 | 20.17                |
| 20D-BOB     | 0.62     | 32.28                 | 13.35                |
| 20D-BOB@PAD | 0.41     | 32.41                 | 20.17                |

The crystal size (D) of the samples was calculated using Scherrer equation <sup>1</sup> :

$$D = \frac{0.9\lambda}{\beta \cos \theta}$$

where  $\lambda$  is the X-ray wavelength (Cu K $\alpha$ ,  $\lambda=1.54056\text{\AA}=0.154056\text{nm}$ ),  $\beta$  is the corrected full width at half maximum (FWHM), and  $\theta$  is the Bragg's angle.

## Reference

- 1.C. Rodwihok, K. Charoensri, D. Wongratanaphisan, W. M. Choi, S. H. Hur, H. J. Park and J. S. Chung, *Journal of Materials Science & Technology*, 2021, **76**, 1-10.
